# Supplementary material for: Resting and postprandial serum bile acid concentrations in dogs with liver disease
Source: PubMed Central journal article supplement — J Vet Intern Med. 2021 May 6;35(3):1333–41. doi: 10.1111/jvim.16134 (PMC8163115; doi:10.1111/jvim.16134), 2021-05-06
Supplement: JVIM-35-1333-s001.pdf [file JVIM-35-1333-s001.pdf]

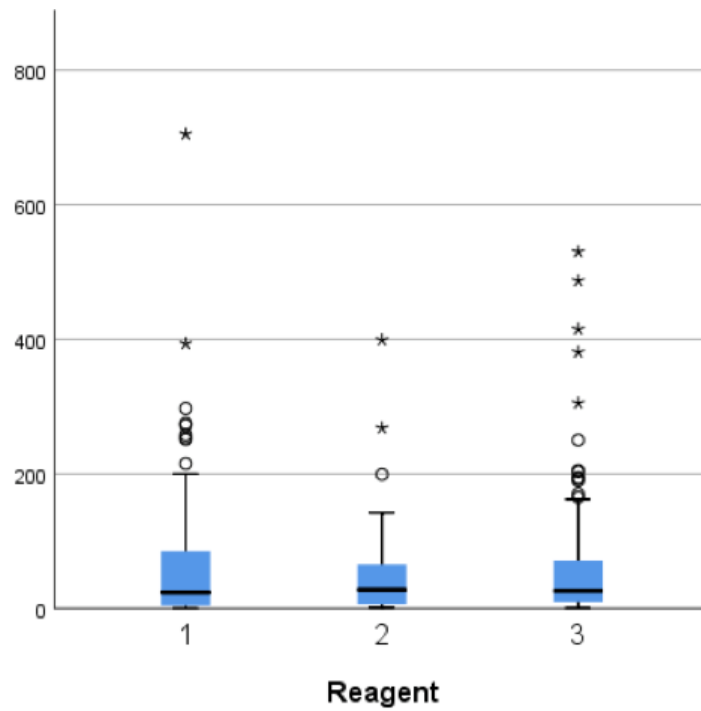

*Supplemental Figure S1 - Box and whiskers plot displaying resting serum bile acid concentrations (Y-axis, in  $\mu\text{mol/L}$ ) measured using the three different reagents, Dialab (1), Randox (2) and Sentinel (3). The horizontal black line in the boxes represents the median serum bile acid concentrations.*
