# Supplementary material for: Resting and postprandial serum bile acid concentrations in dogs with liver disease
Source: PubMed Central journal article supplement — J Vet Intern Med. 2021 May 6;35(3):1333–41. doi: 10.1111/jvim.16134 (PMC8163115; doi:10.1111/jvim.16134), 2021-05-06
Supplement: JVIM-35-1333-s004.pdf [file JVIM-35-1333-s004.pdf]

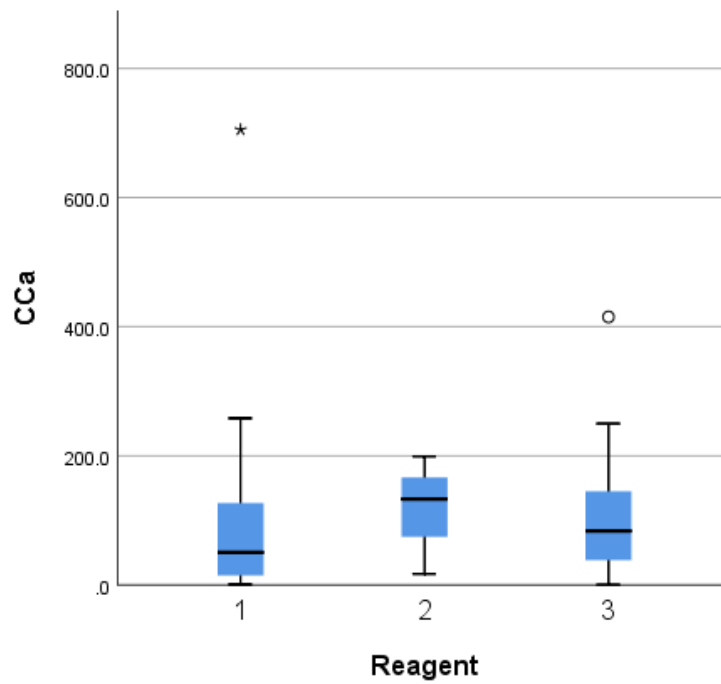

*Supplemental Figure S4 - Box and whiskers plot displaying resting serum bile acid concentrations (Y-axis, in  $\mu\text{mol/L}$ ) in dogs with congenital circulatory anomalies measured using the three different reagents, Dialab (1), Randox (2) and Sentinel (3). The horizontal black line in the boxes represents the median serum bile acid concentrations. CCa, congenital circulatory anomaly.*
